# Supplementary material for: A diet enriched in omega-3 PUFA and inulin prevents type 1 diabetes by restoring gut barrier integrity and immune homeostasis in NOD mice
Source: PubMed Central journal article supplement (PMC9880528; doi:10.3389/fimmu.2022.1089987), 2023-01-13
Supplement: DataSheet_1.pdf [file DataSheet_1.pdf]

**Supplementary Table 1**

| <b>Ingredient</b>  | <b>gr/kg</b> | <b>Ingredient</b>            | <b>gr/kg</b> |
|--------------------|--------------|------------------------------|--------------|
| Crude protein      | 172,335      | Zinc                         | 0,025        |
| Crude fat          | 113,587      | Copper                       | 0,0048       |
| Crude fibre        | 1,461        | Iodine                       | 0,0004       |
| Crude Ash          | 46,417       | Molybdenum                   | 0,0001       |
| Moisture           | 76,430       | Fluorine                     | 0,0034       |
| Disaccharide(s)    | 118,4        | Selenium                     | 0,0002       |
| Polysaccharide(s)  | 415,63       | Cobalt                       | 0,0001       |
| Metab. Energy      | 4,070        | Capric acid C-10:0           | 0,077        |
| Lysine             | 17,391       | Lauric acid C-12:0           | 0,113        |
| Methionine         | 7,216        | Myristic acid C-14:0         | 2,613        |
| Cystine            | 3,189        | Pentadecanoic acid C-15:0    | 0,221        |
| Threonine          | 7,142        | Palmitic acid C-16:0         | 1,731        |
| Tryptophan         | 1,974        | Palmitoleic acid C-16:1      | 3,389        |
| Arginine           | 9,813        | Margaric acid                | 0,077        |
| Histidine          | 5,266        | Stearic acid C-18:0          | 4,728        |
| Isoleucine         | 7,210        | Oleic acid C-18:1            | 24           |
| Phenylalanine      | 7,156        | Linoleic acid C-18:2         | 49,243       |
| Valine             | 3,281        | Linolenic acid C-18:3        | 9,495        |
| Alanine            | 2,502        | Arachidic acid C-20:0        | 0,873        |
| Aspartic acid      | 3,561        | Eicosaenoic acid C-20:1      | 1,680        |
| Glutamic acid      | 23,615       | Eicosadienoic acid C-20:2    | 0,729        |
| Glycine            | 3,123        | Arachidonic acid C-20:4      | 0,545        |
| Proline            | 12,733       | Eicosapentaenoic acid C-20:5 | 7,493        |
| Serine             | 5,251        | Behenic acid C-22:0          | 0,498        |
| Tyrosine           | 9,271        | Acetic acid C-2:0            | 0,077        |
| Vitamin A          | 15           | Docosahexaenoic acid C-22:6  | 2,777        |
| Vitamin D3         | 0,5          | Ricosanic acid               | 0,077        |
| Vitamin E          | 0,183        | Nervonic acid C-24:1         | 0,077        |
| Vitamin K3         | 0,01         | Erucic acid C-22:1           | 1,008        |
| Vitamin B1         | 0,023        | Aluminium                    | 0,0239       |
| Vitamin B2         | 0,023        |                              |              |
| Vitamin B6         | 0,015        |                              |              |
| Vitamin B12        | 0,0004       |                              |              |
| Nicotinic acid     | 0,501        |                              |              |
| Pantothenic acid   | 0,504        |                              |              |
| Folic acid         | 0,1          |                              |              |
| Biotin             | 0,002        |                              |              |
| Choline Chloride   | 1,011        |                              |              |
| Inositol           | 1,11         |                              |              |
| Vitamin C          | 0,2          |                              |              |
| Calcium            | 7,782        |                              |              |
| Phosphorus         | 6,522        |                              |              |
| Digest. Phosphorus | 6,250        |                              |              |
| Magnesium          | 0,570        |                              |              |
| Sodium             | 2,070        |                              |              |
| Potassium          | 5,908        |                              |              |
| Sulfur             | 2,657        |                              |              |
| Chlorine           | 3,025        |                              |              |
| Iron               | 0,148        |                              |              |
| Manganese          | 0,084        |                              |              |

**Table S1: Composition of the anti-inflammatory diet (AID).** AID diet was designed by a dietitian. It was enriched with fish oil (3,6%), linseed oil (2%) and corn oil (7,7%), for a total of 13,3% of fats (PUFAs  $\omega$ 3: $\omega$ 6 ratio 1:3 with specifically 20000mg/kg  $\omega$ 3 and 60000mg/kg  $\omega$ 6) and 8% of fiber (100% Inulin).

## Supplementary Figure 1

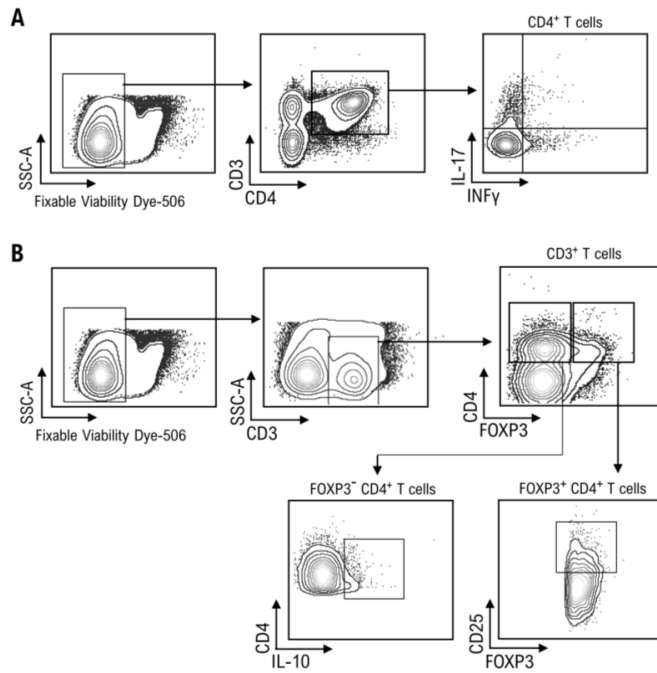

**Figure S1: A.** Flow cytometry gating strategy used to define the following T helper cells subsets used in the study: Th1 cells (Dye-506<sup>+</sup>CD3<sup>+</sup>CD4<sup>+</sup>INF- $\gamma$ <sup>+</sup>), Th17 cells (Dye-506<sup>+</sup>CD3<sup>+</sup>CD4<sup>+</sup>IL-17<sup>+</sup>) and double positive IL-17<sup>+</sup> INF- $\gamma$ <sup>+</sup> T cells (Dye-506<sup>+</sup>CD3<sup>+</sup>CD4<sup>+</sup>INF- $\gamma$ <sup>+</sup> IL-17A<sup>+</sup>). **B.** Flow cytometry gating strategy used to define the following T regulatory cells subsets used in the study: FOXP3<sup>+</sup> regulatory T cells (Dye-506<sup>+</sup>CD3<sup>+</sup>CD4<sup>+</sup>FOXP3<sup>+</sup>CD25<sup>+</sup>) and type 1 regulatory T cells (Dye506<sup>+</sup>CD3<sup>+</sup>CD4<sup>+</sup>FOXP3<sup>-</sup>IL-10<sup>+</sup>).

**Supplementary Table 2**

| <b>Target</b> | <i>Forward primer</i>             | <i>Reverse primer</i>           |
|---------------|-----------------------------------|---------------------------------|
| <i>Il1b</i>   | CAA CCA ACA AGT GAT ATT CTC CAT G | GAT CCA CAC TCT CCA GCT GCA     |
| <i>Il17a</i>  | TCA TCC CTC AAA GCT CAG CG        | TTC ATT GCG GTG GAG AGT CC      |
| <i>Il23</i>   | GTG ACA TGT GGG TTG AGC CT        | GGC ATG AGG TTC CGA AAA GC      |
| <i>Muc1</i>   | TAC CCT ACC TAC CAC ACT CAC G     | CTG CTA CTG CCA TTA CCT GC      |
| <i>Muc2</i>   | CAC CAA CAC GTC AAA AAT CG        | GGT CTC TCG ATC ACC ACC AT      |
| <i>Muc3</i>   | CTT CCA GCC TTC CCT AAA CC        | TCC ACA GAT CCA TGC AAA AC      |
| <i>Muc4</i>   | GAG AGT TCC CTG GCT GTG TC        | GGA CAT GGG TGT CTG TGT TG      |
| <i>Rpl32</i>  | AAG CGA AAC TGG CGG AAA C         | TAA CCG ATG TTG GGC ATC AG      |
| <i>Tjp1</i>   | ACC CGA AAC TGA TGC TGT GGA TAG   | AAA TGG CCG GGC AGA ACT TGT GTA |
| <i>Cldn1</i>  | GAT GTG GAT GGC TGT CAT TG        | CCT GGC CAA ATT CAT ACC TG      |
| <i>Ocln</i>   | TCC GTG AGG CCT TTT GAA           | GGT GCA TAA TGA TTG GGT TTG     |

**Table S2:** List of primers' sequences used in the study.

Supplementary Figure 2

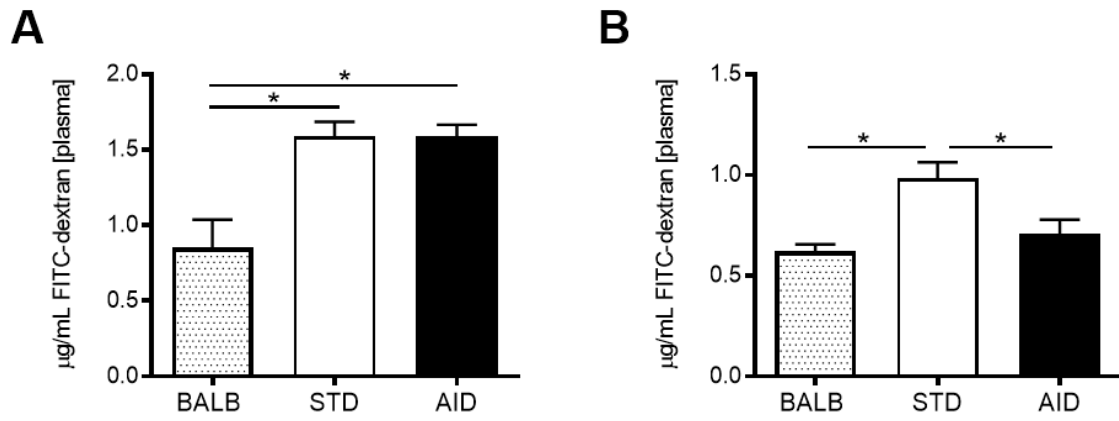

**Figure S2. Gut permeability test in AID and STD diet-fed NOD mice and non-autoimmune mice. A-B.** FITC-dextran in vivo permeability assay in female NOD mice fed with AID or STD diet at 14 weeks (A) and 24 weeks (B) of age; age-matched female BALB/c mice were used as control mice. All data are presented as mean percentages  $\pm$  SEM. \* $p < 0.05$ .

Supplementary Figure 3

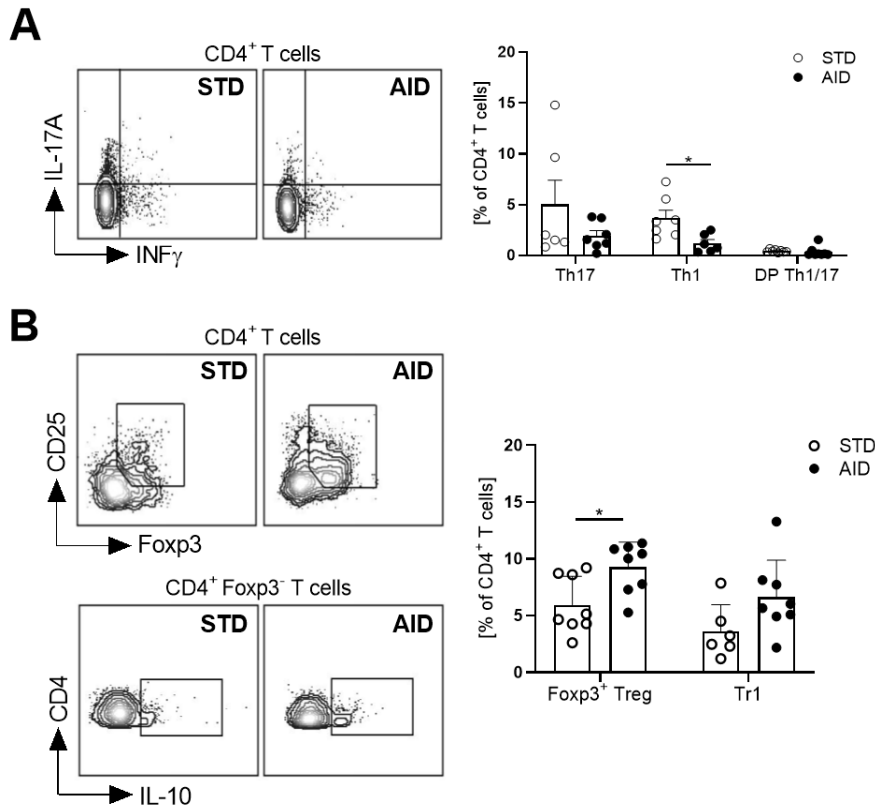

**Figure S3: Immunological profiles in the intestine of AID or STD diet-fed NOD mice. A.** Representative flow cytometry plots (*Left*) and percentages (*Right*) of INF- $\gamma$ <sup>+</sup>CD4<sup>+</sup> (Th1), IL-17<sup>+</sup>CD4<sup>+</sup> (Th17) and INF- $\gamma$ <sup>+</sup>IL-17<sup>+</sup>CD4<sup>+</sup> (DP Th1/17) cells out of total CD4<sup>+</sup> T cells in the large intestinal lamina propria of 12-week-old NOD mice fed with AID or STD diet starting at weaning (4 weeks of age). **B.** Representative flow cytometry plots (*Left*) and percentage (*Right*) of FoxP3<sup>+</sup>CD25<sup>+</sup>CD4<sup>+</sup> (Treg) and IL-10<sup>+</sup>FOXP3<sup>-</sup>CD4<sup>+</sup> (Tr1) cells out of total CD4<sup>+</sup> T cells in the large intestinal lamina propria of 12-week-old NOD mice fed with AID or STD diet. All data are presented as mean percentages  $\pm$  SEM (n=7-8 mice/group). \*p<0.05.



**Supplementary Table 4**

| <b>Metabolite</b>              | <b>Pathway</b>              | <b>Immune regulatory role (pathway)</b>                            |
|--------------------------------|-----------------------------|--------------------------------------------------------------------|
| Docosapentaenoic acid (DPA)    | $\omega$ 6/ $\omega$ 3 PUFA | Anti-inflammatory in models of colitis                             |
| Docosahexaenoic acid (DHA)     | $\omega$ 6/ $\omega$ 3 PUFA | Anti-inflammatory in models of colitis                             |
| Eicosapentaenoic acid (EPA)    | $\omega$ 6/ $\omega$ 3 PUFA | Anti-inflammatory in models of colitis                             |
| Eicosanoic acid/Arachidic acid | Arachidonic acid            | Regulation of mucosal immunity and epithelial gut barrier function |

**Table S4. List of metabolites increased in the intestine (stools) of AID-fed vs STD diet-fed NOD mice.** The associated pathway and immune regulatory/anti-inflammatory function are indicated.
